# Supplementary material for: Metal dyshomeostasis based biomarkers of lung cancer using human biofluids
Source: Royal Society of Chemistry journal article supplement (doi:10.1039/c8mt00139a), 2018-08-14
Supplement: c8mt00139a2.xlsx [file c8mt00139a2.xlsx]

## Sheet: TOTAL SERUM
TOTAL SERUM	Medium Concentration HC (ng g-1)	a SEM in HC group (ng g-1)	Medium Concentration LC (ng g-1)	b SEM in LC group (ng g-1)	Fold Change (LC/HC)	VIP	p-value	AUC
V	0.0463718	0.020887	0.1748	0.0394491	3.76952	1.82	3.9e-05	0.76
Cr	0.506596	0.21328	0.959145	0.151836	1.89332	1.96	1.1e-05	0.78
Mn	1.14463	0.141121	1.73858	0.0842169	1.51891	0.95	0	0.84
Fe	2947.88	470.754	6151.66	981.27	2.08681	0.89	0.011	0.66
Co	0.269765	0.0693298	0.461825	0.0702639	1.71195	0.94	0.022	0.65
Cu	1251.08	56.0116	1428.73	51.5223	1.142	0.62	0.013	0.66
Zn	917.459	75.5449	1136.38	67.0419	1.23862	0.41	0.003	0.69
Se	187.808	5.85164	191.851	6.59943	1.02153	0.14	0.92	0.61
Mo	0.434611	0.0576181	0.726915	0.224207	1.67257	0.66	0.38	0.56
Cd	0.0722622	0.00491494	0.180362	0.0372145	2.49594	0.4	0.11	0.6
Pb	1.11083	0.113757	1.53532	0.176583	1.38214	0.29	0.14	0.6
a Standard error of the mean (n=39)
b Standard error of the mean (n=48)
Fold changes (Lung cancer vs healthy people)
Variable importance on the projection values (VIP)
p-value (statistical pairwise comparisons by MannWhitney U test)
AUC values of ROC curves

## Sheet: TOTAL SERUM (RATIOS)
SERUM RATIOS	Medium Concentration HC (ng g-1)	a SEM in HC group (ng g-1)	Medium Concentration LC (ng g-1)	b SEM in LC group (ng g-1)	Fold Change (LC/HC)	VIP	p-value	AUC
V/Cr	0.376073	0.23068	0.190597	0.033892	0.506808	0.88	0.011	0.78
V/Mn	0.0231628	0.00765567	0.0822051	0.0134281	3.54902	1.43	3e-05	0.76
V/Fe	2.30675e-05	9.9899e-06	5.27801e-05	1.26842e-05	2.28807	1.45	0.00025	0.73
V/Co	0.205814	0.0670922	0.530606	0.0830188	2.57808	1.37	0.0002	0.74
V/Cu	4.08635e-05	1.78985e-05	0.000130923	2.92097e-05	3.20392	1.52	0.0001	0.75
V/Zn	3.99947e-05	1.50458e-05	0.000163902	3.66987e-05	4.0981	1.5	5e-05	0.76
V/Se	0.000236828	9.72426e-05	0.00103564	0.000264027	4.37298	1.55	3e-05	0.76
V/Mo	0.112469	0.0625994	0.345514	0.0850729	3.07209	1.2	0.01	0.57
V/Cd	0.562978	0.237432	2.11336	0.903513	3.75389	1.35	0.0005	0.67
V/Pb	0.0323199	0.0116292	0.13788	0.0222012	4.26609	1.47	2e-05	0.76
Cr/Mn	0.301186	0.13149	0.511298	0.0795441	1.69762	1.51	5e-05	0.76
Cr/Fe	0.00034758	0.000183422	0.000272135	4.90121e-05	0.782943	1.51	0.0002	0.74
Cr/Co	1.82858	0.514442	5.66706	1.85696	3.09915	1.32	0.004	0.69
Cr/Cu	0.000454777	0.000189043	0.000678431	9.471e-05	1.49179	1.58	3e-05	0.76
Cr/Zn	0.000392346	0.000131761	0.000926559	0.000153029	2.36159	1.56	5e-05	0.76
Cr/Se	0.0028924	0.00125565	0.00530338	0.000829085	1.83356	1.66	2e-05	0.77
Cr/Mo	1.73066	0.755222	2.42154	0.622232	1.3992	1.3	0.005	0.57
Cr/Cd	6.57196	2.61689	23.733	10.6563	3.61126	1.39	0.001	0.65
Cr/Pb	0.345966	0.136804	0.964019	0.190421	2.78645	1.64	0.0003	0.76
Mn/Fe	0.000603813	8.15033e-05	0.00058508	6.49058e-05	0.968977	0.6	0.974	0.5
Mn/Co	9.4186	1.40021	8.91661	1.70183	0.946702	0.58	0.501	0.52
Mn/Cu	0.00096217	0.000116908	0.00129304	7.84095e-05	1.34388	0.55	0.0005	0.72
Mn/Zn	0.00126422	8.81326e-05	0.00172536	0.000114597	1.36476	0.56	0.004	0.69
Mn/Se	0.00608631	0.000608459	0.00960537	0.00062131	1.57819	0.84	8e-06	0.78
Mn/Mo	5.33506	2.42346	4.09701	0.727612	0.76794	0.47	0.52655	0.6
Mn/Cd	18.0799	2.06281	33.2908	11.6579	1.84132	0.29	0.424	0.65
Mn/Pb	1.13954	0.0932357	1.67686	0.213075	1.47152	0.36	0.049	0.62
Fe/Co	29066	5657.59	38677.5	11089.4	1.33068	0.57	0.385	0.53
Fe/Cu	29066	5657.59	38677.5	11089.4	1.33068	0.57	0.385	0.53
Fe/Zn	3.5471	0.544204	5.97024	0.951312	1.68313	0.89	0.213	0.58
Fe/Se	15.1927	2.05888	32.9716	5.07921	2.17023	1.08	0.014	0.66
Fe/Mo	10961.4	3089.5	17944.5	5418.44	1.63707	0.23	0.963	0.63
Fe/Cd	47805.9	7794.44	142587	59277	2.98263	0.24	0.245	0.64
Fe/Pb	47805.9	7794.44	142587	59277	2.98263	0.24	0.245	0.64
Co/Cu	0.000243313	6.28509e-05	0.000346247	5.47236e-05	1.42305	0.72	0.0601	0.62
Co/Zn	0.000250717	4.12146e-05	0.00042924	7.26024e-05	1.71205	0.64	0.129	0.6
Co/Se	0.00151339	0.000380911	0.00274087	0.000465473	1.81107	0.73	0.027	0.64
Co/Mo	1.18387	0.361794	1.01129	0.205864	0.854227	1.16	0.621	0.58
Co/Cd	3.73492	0.843596	5.18801	1.26654	1.38906	0.84	0.869	0.55
Co/Pb	0.240923	0.0498329	0.295989	0.029877	1.22856	0.7	0.061	0.61
Cu/Zn	1.56412	0.113702	1.42739	0.0884927	0.912579	0.26	0.22	0.58
Cu/Se	6.85317	0.365126	7.83361	0.355994	1.14306	0.46	0.034	0.64
Cu/Mo	5682.93	2251.52	3141.47	541.599	0.552791	0.77	0.182	0.68
Cu/Cd	22112	2867.39	32752.5	12941.7	1.48121	0.66	0.0162	0.71
Cu/Pb	1464.72	156.101	1452.22	184.206	0.991472	0.19	0.637	0.54
Zn/Se	4.95962	0.383746	6.25867	0.461525	1.26193	0.37	0.032	0.64
Zn/Mo	3842.17	1308.45	2061.81	305.681	0.536628	1.1	0.117	0.69
Zn/Cd	14743.3	1437.28	21874.5	7620.68	1.48369	0.73	0.032	0.7
Zn/Pb	968.96	70.0065	1078.18	115.697	1.11272	0.24	0.84	0.52
Se/Mo	914.81	384.947	438.042	62.7503	0.478833	0.93	0.08	0.69
Se/Cd	3220.65	357.289	4199.98	1531.56	1.30408	0.85	0.0026	0.74
Se/Pb	215.043	18.815	198.265	21.6872	0.921976	0.44	0.182	0.6
Mo/Cd	7.16486	1.06509	26.5345	16.097	3.70342	0.49	0.13	0.65
Mo/Pb	0.491703	0.0711537	0.850098	0.357646	1.72889	0.82	0.097	0.62
Cd/Pb	0.0776641	0.00709802	0.132612	0.0182089	1.7075	0.52	0.1478	0.58
a Standard error of the mean (n=39)
b Standard error of the mean (n=48)
Fold changes (Lung cancer vs healthy people)
Variable importance on the projection values (VIP)
p-value (statistical pairwise comparisons by MannWhitney U test)
AUC values of ROC curves

## Sheet: SERUM-HMM
SERUM-HMM	Medium Concentration HC (ng g-1)	a SEM in HC group (ng g-1)	Medium Concentration LC (ng g-1)	b SEM in LC group (ng g-1)	Fold Change (LC/HC)	VIP	p-value	AUC
V-HMM	0.0384072	0.017424	0.193242	0.043424	5.03139	1.72	7e-06	0.78
Cr-HMM	0.391754	0.168669	0.826025	0.114749	2.10853	1.89	3e-05	0.78
Mn-HMM	1.19968	0.125934	1.39987	0.0922961	1.16688	0.45	0.067	0.62
Fe-HMM	2792.62	467.993	5815.7	913.884	2.08253	0.85	0.007	0.67
Co-HMM	0.278069	0.0727298	0.478105	0.0663395	1.71938	1.09	0.013	0.66
Cu-HMM	1145.11	54.9613	1292.32	52.4579	1.12856	0.37	0.06	0.61
Zn-HMM	541.926	70.9028	804.041	52.4801	1.48367	0.98	2e-05	0.75
Se-HMM	176.542	6.11283	177.767	6.04467	1.00694	0.22	0.83	0.51
Mo-HMM	0.397329	0.0550186	0.661415	0.211719	1.66465	0.99	0.39	0.56
Cd-HMM	0.0667199	0.00483757	0.159137	0.0352108	2.38515	0.36	0.27	0.57
Pb-HMM	1.05362	0.106885	1.4575	0.171608	1.38332	0.31	0.2	0.58
a Standard error of the mean (n=39)
b Standard error of the mean (n=48)
Fold changes (Lung cancer vs healthy people)
Variable importance on the projection values (VIP)
p-value (statistical pairwise comparisons by MannWhitney U test)
AUC values of ROC curves
HMM (High Molecular Mass)

## Sheet: SERUM-LMM
TOTAL SERUM	Medium Concentration HC (ng g-1)	a SEM in HC group (ng g-1)	Medium Concentration LC (ng g-1)	b SEM in LC group (ng g-1)	Fold Change (LC/HC)	VIP	p-value	AUC
V-LMM	<LD	<LD	0.00817604	0.00671939	-	-	-	-
Cr-LMM	0.10234	0.0486669	0.175604	0.0524092	1.71588	1.09	0.06	0.62
Mn-LMM	0.112567	0.0253888	0.339309	0.0640773	3.01428	0.97	0.0055	0.68
Fe-LMM	30.5233	2.34438	33.2835	2.9225	1.09043	0.2	0.9217	0.51
Co-LMM	<LD	<LD	<LD	<LD	-	-	-	-
Cu-LMM	33.3286	2.70071	76.2854	2.52176	2.28889	2.08	0	0.93
Zn-LMM	339.379	14.2639	308.815	25.381	0.909942	0.65	0.0392	0.63
Se-LMM	1.55229	0.12519	1.94978	0.139798	1.25606	0.53	0.0493	0.63
Mo-LMM	0.0432733	0.0100132	0.0408423	0.0147372	0.943822	1.55	0.022	0.65
Cd-LMM	0.00343288	0.000364824	0.00314227	0.000393786	0.915344	0.4	0.2427	0.58
Pb-LMM	0.0112937	0.0047626	0.00734838	0.00159819	0.650661	0.22	0.789	0.52
a Standard error of the mean (n=39)
b Standard error of the mean (n=48)
Fold changes (Lung cancer vs healthy people)
Variable importance on the projection values (VIP)
p-value (statistical pairwise comparisons by MannWhitney U test)
AUC values of ROC curves
LMM (High Molecular Mass)
LD (V) = 0.001 ng g-1
LD (Co) = 0.004 ng g-1

## Sheet: TOTAL URINE
TOTAL URINE	Medium Concentration HC (ng g-1)	a SEM in HC group (ng g-1)	Medium Concentration LC (ng g-1)	b SEM in LC group (ng g-1)	Fold Change (LC/HC)	VIP	p-value	AUC
V	1.30948	0.0857738	1.34069	0.0890462	1.02383	0.3	0.49	0.54
Cr	1.91066	0.267808	1.89507	0.171755	0.991843	0.71	0.5	0.54
Mn	4.08716	0.577943	3.48216	0.229927	0.851976	1.11	0.85	0.5
Fe	35.4865	3.57688	50.4855	4.18081	1.42267	0.95	0.03	0.62
Co	0.645107	0.0525239	0.431532	0.0246913	0.66893	1.36	0.02	0.69
Cu	15.1647	1.79649	20.4805	1.9847	1.35053	0.99	0.07	0.63
Zn	572.277	115.148	636.992	89.7266	1.11308	1.1	0.32	0.55
Se	36.4549	4.54756	51.6056	6.35503	1.4156	0.91	0.12	0.6
Mo	25.8066	3.54468	32.7665	2.94534	1.2697	0.6	0.08	0.59
Cd	0.553151	0.0721059	1.58158	0.212085	2.85922	1.7	1e-05	0.79
Pb	6.20339	0.482912	7.36652	0.455879	1.1875	0.37	0.16	0.59
a Standard error of the mean (n=39)
b Standard error of the mean (n=48)
Fold changes (Lung cancer vs healthy people)
Variable importance on the projection values (VIP)
p-value (statistical pairwise comparisons by MannWhitney U test)
AUC values of ROC curves

## Sheet: TOTAL URINE (RATIOS)
TOTAL URINE (RATIOS)	Medium Concentration HC (ng g-1)	a SEM in HC group (ng g-1)	Medium Concentration LC (ng g-1)	b SEM in LC group (ng g-1)	Fold Change (LC/HC)	VIP	p-value	AUC
V/Cr	0.831564	0.0584897	0.845705	0.0770215	1.01701	0.26	0.38	0.55
V/Mn	0.411273	0.0356212	0.486628	0.0511339	1.18323	0.58	0.82	0.53
V/Fe	0.0477812	0.00562235	0.0403321	0.00616441	0.844101	0.62	0.015	0.65
V/Co	2.48882	0.21331	3.70425	0.348291	1.48836	1.33	0.025	0.63
V/Cu	0.116705	0.0134408	0.104353	0.0208333	0.894156	0.8	0.083	0.6
V/Zn	0.0053727	0.000863723	0.00482356	0.000728981	0.89779	0.59	0.36	0.57
V/Se	0.051864	0.00894391	0.0477613	0.00635627	0.920896	0.57	0.35	0.56
V/Cd	3.83235	0.731954	1.60118	0.195823	0.417807	1.48	2e-05	0.75
V/Pb	0.221734	0.0172129	0.222584	0.0226026	1.00383	0.19	0.38	0.55
Cr/Mn	0.626796	0.0980059	0.631527	0.0636883	1.00755	0.57	0.2	0.59
Cr/Fe	0.0631004	0.00645035	0.0465076	0.00356641	0.737041	0.98	0.027	0.64
Cr/Co	3.5368	0.467763	4.64922	0.323622	1.31453	1.5	0.0054	0.66
Cr/Cu	0.173715	0.026271	0.123343	0.0149168	0.710034	1.1	0.1	0.59
Cr/Zn	0.00659943	0.00088738	0.00614522	0.000982127	0.931174	0.64	0.27	0.58
Cr/Se	0.0826754	0.0174903	0.0567094	0.00631002	0.685928	0.79	0.38	0.56
Cr/Mo	0.0994335	0.0147788	0.0841236	0.00842953	0.846029	0.44	0.44	0.56
Cr/Cd	6.38037	1.46698	2.33467	0.469929	0.365915	1.81	6e-06	0.76
Cr/Pb	0.331613	0.0546184	0.30522	0.0485111	0.920412	0.38	0.24	0.57
Mn/Fe	0.120896	0.0140811	0.0812491	0.00604127	0.672058	1.29	0.0016	0.69
Mn/Co	7.50457	1.00872	9.73735	0.935218	1.29752	0.8	0.056	0.61
Mn/Cu	0.329665	0.0436192	0.239199	0.0282577	0.725581	1.12	0.016	0.63
Mn/Zn	0.0142408	0.00234215	0.0112071	0.00174379	0.786972	0.8	0.33	0.57
Mn/Se	0.155132	0.0375501	0.11465	0.0159916	0.739051	0.97	0.14	0.59
Mn/Mo	0.200826	0.0378859	0.173745	0.0231427	0.865149	0.51	0.33	0.67
Mn/Cd	10.6208	1.6631	3.94756	0.478416	0.37168	2.07	2e-06	0.77
Mn/Pb	0.626771	0.0695119	0.508331	0.0364696	0.811031	0.85	0.04	0.63
Fe/Co	63.719	6.92594	131.809	16.5016	2.0686	1.26	0.0004	0.7
Fe/Cu	2.81958	0.28622	3.02623	0.314473	1.07329	0.45	0.953	0.51
Fe/Zn	0.144033	0.0313206	0.14098	0.0196052	0.978801	0.65	0.86	0.5
Fe/Se	1.61444	0.421762	1.56194	0.22558	0.967482	0.52	0.83	0.51
Fe/Mo	1.92858	0.360388	2.26395	0.314334	1.17389	0.34	0.83	0.5
Fe/Cd	99.4882	17.4752	54.3228	7.80172	0.546023	1.23	0.002	0.68
Fe/Pb	5.94728	0.615033	7.12764	0.630954	1.19847	0.52	0.22	0.58
Co/Cu	0.0453015	0.00476521	0.0274983	0.00369522	0.607007	1.47	0.0002	0.71
Co/Zn	0.00205153	0.000346617	0.00134164	0.000219209	0.653971	0.82	0.034	0.64
Co/Se	0.0202212	0.0028517	0.0127208	0.00170285	0.629083	1.01	0.002	0.69
Co/Mo	0.0285532	0.00360704	0.0204533	0.00265445	0.716322	0.79	0.034	0.64
Co/Cd	1.55624	0.244139	0.418908	0.0466398	0.26918	1.9	0	0.81
Co/Pb	0.0946665	0.00885771	0.0645182	0.0063305	0.681531	1.02	0.001	0.7
Cu/Zn	0.0539329	0.0116117	0.0551235	0.00698154	1.02208	0.58	0.26	0.56
Cu/Se	0.5656	0.121638	0.558607	0.05657	0.987636	0.42	0.53	0.54
Cu/Mo	0.723299	0.107542	0.94537	0.141899	1.30703	0.57	0.5	0.53
Cu/Cd	34.5349	4.05947	19.018	1.81344	0.55069	1.31	0.0003	0.71
Cu/Pb	2.38265	0.240561	3.08564	0.303384	1.29505	0.87	0.26	0.57
Zn/Se	16.2631	2.24342	13.2498	1.17247	0.814715	0.28	0.74	0.52
Zn/Mo	22.6811	3.17985	25.2689	4.85664	1.1141	0.46	0.67	0.54
Zn/Cd	1315.82	252.945	468.106	41.8136	0.355753	1.52	0.00056	0.7
Zn/Pb	93.6796	16.1626	97.991	18.1156	1.04602	0.58	0.97	0.5
Se/Mo	1.67116	0.246881	2.07543	0.264582	1.24191	0.51	0.92	0.5
Se/Cd	87.1284	10.5933	46.1303	6.3967	0.529452	1.63	4e-05	0.74
Se/Pb	6.27495	0.663044	8.27469	1.31047	1.31869	0.6	0.72	0.52
Mo/Cd	75.0549	13.5494	34.7154	4.16886	0.462533	1.52	0.0004	0.7
Mo/Pb	5.05737	0.808875	5.159	0.544318	1.0201	0.27	0.83	0.51
Cd/Pb	0.093837	0.0134406	0.231948	0.0303805	2.47182	1.57	6e-05	0.75
a Standard error of the mean (n=39)
b Standard error of the mean (n=48)
Fold changes (Lung cancer vs healthy people)
Variable importance on the projection values (VIP)
p-value (statistical pairwise comparisons by MannWhitney U test)
AUC values of ROC curves

## Sheet: TOTAL BALF
TOTAL BALF	Medium Concentration NCC (ng g-1)	a SEM in NCC group (ng g-1)	Medium Concentration LC (ng g-1)	b SEM in LC group (ng g-1)	Fold Change (LC/HC)	VIP	p-value	AUC
V	1.24422	0.0399326	1.38205	0.0261035	1.11077	0.62	0.003	0.71
Cr	0.188728	0.0434973	0.297631	0.067835	1.57704	0.84	0.39	0.56
Mn	0.460782	0.0619298	0.694298	0.0878925	1.50678	1.29	0.003	0.75
Fe	39.79	20.0998	21.7343	5.09465	0.546224	0.7	0.87	0.51
Co	0.00134173	0.000738094	0.00751328	0.00322481	5.5997	1.64	0.042	0.65
Cu	3.55168	1.5407	4.92985	0.95883	1.38803	0.98	0.3	0.65
Zn	15.0181	5.6845	35.0646	13.3768	2.33483	0.72	0.042	0.58
Se	3.42648	0.520281	3.53618	0.575049	1.03202	0.32	0.87	0.51
Mo	0.0923332	0.0246747	0.105695	0.0166905	1.14471	0.85	0.19	0.6
Cd	0.0764477	0.015863	0.139001	0.0437661	1.81825	0.85	0.24	0.58
Pb	0.159413	0.0178925	0.474276	0.127138	2.97515	1.55	0.005	0.7
a Standard error of the mean (n=31)
b Standard error of the mean (n=24)
Fold changes (Lung cancer vs healthy people)
Variable importance on the projection values (VIP)
p-value (statistical pairwise comparisons by MannWhitney U test)
AUC values of ROC curves

## Sheet: TOTAL BALF (RATIOS)
TOTAL BALF (RATIOS)	Medium Concentration NCC (ng g-1)	a SEM in NCC group (ng g-1)	Medium Concentration LC (ng g-1)	b SEM in LC group (ng g-1)	Fold Change (LC/HC)	VIP	p-value	AUC
V/Cr	12.7317	3.08878	4.9195	0.82074	0.386399	0.6	0.133	0.57
V/Mn	4.37267	0.475301	2.96436	0.479201	0.677928	1.58	0.018	0.67
V/Fe	0.220468	0.0463997	0.410826	0.141922	1.86343	0.46	0.814	0.5
V/Co	161.741	23.7639	304.712	82.1128	1.88395	0.54	0.8513	0.51
V/Cu	1.03205	0.100034	0.507265	0.107382	0.485709	1.22	0.018	0.76
V/Zn	0.0975735	0.0128036	0.149125	0.0589796	1.52834	0.62	0.38	0.56
V/Se	0.801623	0.206664	0.748727	0.13946	0.934013	0.33	0.71	0.53
V/Mo	41.0928	16.4089	135.973	74.8782	3.30893	0.55	0.083	0.67
V/Cd	208.216	156.472	34.1841	9.58522	0.164176	0.97	0.13	0.63
V/Pb	14.0374	2.67024	11.1459	3.54196	0.794013	1.38	0.028	0.64
Cr/Mn	0.434841	0.0792499	0.393863	0.102046	0.905762	0.4	0.61	0.54
Cr/Fe	0.0279716	0.00623984	0.0297145	0.0118064	1.06231	0.57	0.58	0.55
Cr/Co	9.15305	2.74642	17.756	4.11185	1.9399	0.56	0.23	0.54
Cr/Cu	0.1158	0.0232398	0.160261	0.0799155	1.38394	0.23	0.62	0.55
Cr/Zn	0.0157681	0.00244662	0.0417028	0.0176258	2.64475	0.45	0.7	0.54
Cr/Se	0.0841528	0.024058	0.0827894	0.0194552	0.983799	0.4	0.67	0.53
Cr/Mo	4.44649	1.64977	3.04569	0.546954	0.684964	0.24	0.55	0.5
Cr/Cd	34.504	25.5086	3.96705	0.960172	0.114974	0.66	0.55	0.56
Cr/Pb	3.28779	1.80899	2.74924	1.73501	0.836195	0.4	0.52	0.54
Mn/Fe	0.0615313	0.0113261	0.122424	0.0293618	1.98962	1.14	0.061	0.61
Mn/Co	123.236	24.2101	130.118	19.6661	1.05584	0.25	0.95	0.52
Mn/Cu	0.296621	0.0376554	0.498632	0.245699	1.68104	0.98	0.76	0.54
Mn/Zn	0.0476515	0.00910064	0.0658588	0.0204691	1.38209	0.32	0.85	0.62
Mn/Se	0.246421	0.048994	0.335997	0.066013	1.36351	1.43	0.021	0.66
Mn/Mo	8.28565	1.21427	8.78916	1.2008	1.06077	1.17	0.22	0.53
Mn/Cd	49.197	33.8197	12.8993	2.5729	0.262196	0.15	0.73	0.51
Mn/Pb	5.8371	1.8083	7.004	3.87523	1.19991	0.13	0.93	0.51
Fe/Co	5982.87	1610.71	6345.57	2480.85	1.06062	0.25	0.95	0.61
Fe/Cu	27.255	13.1279	9.17147	2.62201	0.336506	1.05	0.051	0.65
Fe/Zn	0.886819	0.150953	2.34272	0.872617	2.64171	0.31	0.98	0.52
Fe/Se	19.3058	9.17836	9.14138	2.98776	0.473505	0.38	0.52	0.55
Fe/Mo	898.331	428.41	798.365	409.281	0.888721	0.58	0.45	0.6
Fe/Cd	1365.09	667.223	371.478	107.184	0.272128	0.79	0.4	0.59
Fe/Pb	317.058	142.356	87.3629	25.7879	0.275543	1.43	0.032	0.64
Co/Cu	0.000185359	0.000100179	0.000889763	0.000283156	4.8002	1.74	0.036	0.64
Co/Se	0.00042364	0.000205092	0.0012405	0.000502814	2.9282	1.73	0.039	0.65
Co/Mo	0.00930307	0.00486681	0.0190018	0.00608173	2.04253	1.82	0.025	0.64
Co/Cd	0.0212536	0.0141533	0.0401868	0.0185925	1.89082	1.75	0.029	0.64
Co/Pb	0.0083128	0.0047417	0.0169977	0.00647784	2.04476	1.51	0.062	0.64
Cu/Zn	0.327276	0.0822012	0.612129	0.200846	1.87037	0.62	0.52	0.56
Cu/Se	1.1853	0.337788	1.99143	0.522585	1.68011	1.02	0.094	0.54
Cu/Mo	54.9531	13.1388	210.769	143.901	3.83542	0.7	0.25	0.52
Cu/Cd	219.017	106.612	82.1749	20.0645	0.375198	0.44	0.65	0.51
Cu/Pb	36.5516	13.6929	19.4749	5.33555	0.532806	0.86	0.97	0.52
Zn/Se	2.91921	0.820819	7.51399	3.3095	2.57398	0.72	0.38	0.56
Zn/Mo	236.792	84.7644	314.084	95.1484	1.32641	1.07	0.25	0.56
Zn/Cd	297.889	92.652	520.846	187.036	1.74846	0.68	0.42	0.54
Zn/Pb	281.168	126.392	441.432	339.672	1.57	0.46	0.6	0.54
Se/Mo	66.5494	11.2081	289.653	183.868	4.35246	0.53	0.37	0.61
Se/Cd	301.12	142.331	69.1417	14.8971	0.229615	0.83	0.23	0.61
Se/Pb	47.748	13.0338	45.1286	29.2043	0.945141	1.06	0.033	0.64
Mo/Cd	12.9306	9.95432	1.47302	0.304911	0.113917	1.49	0.17	0.62
Mo/Pb	0.862294	0.200025	0.667709	0.283778	0.774341	1.62	0.042	0.63
Cd/Pb	0.805764	0.168372	0.664086	0.269341	0.824169	0.39	0.31	0.56
a Standard error of the mean (n=31)
b Standard error of the mean (n=24)
Fold changes (Lung cancer vs healthy people)
Variable importance on the projection values (VIP)
p-value (statistical pairwise comparisons by MannWhitney U test)
AUC values of ROC curves
